# Supplementary material
Source: Springer Nature journal article supplement (https://www.springermedizin.de/resource/supplementary/13012_2011_543_MOESM3_ESM.pdf/9630110)
Supplement: MOESM3 [file 9630110]

Table 2: Summary of belief statements and sample quotes from Anesthesiologist and Surgeons assigned to the theoretical domains identified as not relevant

| Domains                                           | Specific belief                                                                                                   | Sample quote                                                                                                                                                                                                                                                                                                                                                                                                                                                               | Frequency out of 16 |
|---------------------------------------------------|-------------------------------------------------------------------------------------------------------------------|----------------------------------------------------------------------------------------------------------------------------------------------------------------------------------------------------------------------------------------------------------------------------------------------------------------------------------------------------------------------------------------------------------------------------------------------------------------------------|---------------------|
| <i>Knowledge</i>                                  | I am aware of guidelines. (provincial/national)                                                                   | "Yes, so there are guidelines from the Canadian Anaesthesia Society and then various bodies around the world have published guideline...for pre-operative testing." (A5)<br>"I can't recite you any specific guidelines but I've heard that there are some standards that way either from talking to anaesthetists...so yes there are some guidelines but I can't tell you specifically." (S5)                                                                             | 15                  |
| <i>Skills</i>                                     | As long as you're adequately trained to take a pre-op assessment you are skilled enough to order "routine" tests. | "So I think experience in pre-operative assessment clinics during training and some exposure to surgery or understanding of it... " (A2)<br>"At a minimal you should have training as a nurse...in terms of some specialized training to screen patients." (A8)<br>"...in general, you know particularly with you know a low-risk population and a low-risk operation, I thought a person with experience, training and interest so on, could probably do very well." (S1) | 16                  |
| <i>Motivation and goals</i>                       | Routinely ordering tests is not an important part of my pre-op evaluation.                                        | "When it's necessary it's very important but overall I think most of the time it's unnecessary." (A6)<br>"It's not important (to perform Pre-op tests in your pre-op evaluation of a pt. having a low risk surgical procedure)." (S3)                                                                                                                                                                                                                                      | 9                   |
|                                                   | I, personally, do not feel I need to order routine tests.                                                         | "No....it's something that I don't think needs to be done." (A7)<br>"No...(it's not something I need to do)." (S1)                                                                                                                                                                                                                                                                                                                                                         | 14                  |
| <i>Memory, attention &amp; decision processes</i> | My decision to order or not order tests is based on patient history and medical condition.                        | "I would only order them if I felt that there was some sort of medical issue that needed to be addressed. Yeah that's it." (A3)<br>"My pre-operative evaluations are primarily related to their surgical condition..." (S5)                                                                                                                                                                                                                                                | 16                  |
| <i>Emotion</i>                                    | My emotions do not influence whether or not I order routine tests.                                                | Does not ordering tests in a pre-op evaluation for patient having a low-risk surgery evoke worry or concern in you? " <b>No it wouldn't.</b> " (A1)<br>"If they do not need it and I am not ordering it, I'm not at all concerned about it, no." (S4)                                                                                                                                                                                                                      | 16                  |

Note: "A#" indicates sample quote by anesthesiologist "S#" indicates sample quote by surgeon.
